# Supplementary material for: A multi-enzyme cascade coupled with electrochemistry for efficient synthesis of l -lactate from carbon dioxide
Source: Royal Society of Chemistry journal article supplement (doi:10.1039/d5gc05391a), 2025-11-06
Supplement: d5gc05391a1.pdf [file d5gc05391a1.pdf]

## Supplementary information

### **A multi-enzyme cascade coupled with electrochemistry for efficient synthesis of L-lactate from carbon dioxide**

Sanquan Liang, <sup>a, b, 1</sup> Zhiyao Peng, <sup>a, 1</sup> Xue Xia, <sup>a</sup> Kaixing Xiao, <sup>a</sup> Zhao Qin, <sup>a</sup> Xuemei Liu, <sup>a</sup> Fanzhen Lin, <sup>a</sup> Mengdie Wang, <sup>a</sup> Saimeng Jin, <sup>\*a</sup> James H. Clark <sup>c</sup> and Dan Wang <sup>\*a</sup>

<sup>a</sup> Department of Chemical Engineering, School of Chemistry and Chemical Engineering, Chongqing University, Chongqing 401331, China

<sup>b</sup> College of Food Science and Nutritional Engineering, China Agricultural University, Beijing 100083, China

<sup>c</sup> Circa Renewable Chemistry Institute, Green Chemistry Centre of Excellence, University of York, York YO10 5DD, UK

<sup>\*</sup> Corresponding author, Saimeng Jin, E-mail: sj708@cqu.edu.cn; Dan Wang, dwang@cqu.edu.cn

<sup>1</sup> Contributed equally to this work.

**Table S1.** Strains and plasmids used in this study.

| Strains                     | Relevant characteristics                                                                                       | Source     |
|-----------------------------|----------------------------------------------------------------------------------------------------------------|------------|
| <i>E. coli</i> DH5 $\alpha$ | Host for cloning plasmids                                                                                      | Lab stock  |
| <i>E. coli</i> BL21(DE3)    | Host for expression plasmids                                                                                   | Lab stock  |
| ECLA                        | <i>E. coli</i> DH5 $\alpha$ carrying plasmid pET28aA                                                           | This study |
| ECLP                        | <i>E. coli</i> DH5 $\alpha$ carrying plasmid pET28aP                                                           | This study |
| ECLP-177                    | <i>E. coli</i> DH5 $\alpha$ carrying plasmid pET28aP <sub>2</sub>                                              | This study |
| ECLL                        | <i>E. coli</i> DH5 $\alpha$ carrying plasmid pET28aL                                                           | This study |
| Plasmids                    |                                                                                                                |            |
| pET28a(+)                   | Expression vector, Kan <sup>R</sup>                                                                            | Lab stock  |
| pET28aA                     | pET28a(+) carries a alcohol dehydrogenase (ADH) gene from <i>Kluyveromyces lactis</i> , Kan <sup>R</sup>       | This study |
| pET28aP                     | pET28a(+) carries a pyruvate decarboxylase (PDC) gene from <i>Zymomonas mobilis</i> , Kan <sup>R</sup>         | This study |
| pET28aP <sub>2</sub>        | pET28a(+) carries a mutated PDC gene (A25T/H414D/E473Q/I476Y) from <i>Zymomonas mobilis</i> , Kan <sup>R</sup> | This study |
| pET28aL                     | pET28a(+) carries a L-lactate dehydrogenase (LDH) gene from <i>Theileria annulata</i> , Kan <sup>R</sup>       | This study |

**Table S2.** List of primers used in this study.

| Primers   | Sequence of primer                                  | Source     |
|-----------|-----------------------------------------------------|------------|
| pET28aA-F | 5'- AATGGGTCGCGGATCCATGTTCAGAT TAGCCCG-3'           | This study |
| pET28aA-R | 5'- TGTCGACGGAGCTCGAATTTTATTTGT AAGTGTCAACGACG-3'   | This study |
| pET28aP-F | 5'-GCAAATGGGTCGCGGATCCATGTCATA TACTGTAGGAACATACC-3' | This study |
| pET28aP-R | 5'-GCTTGTCGACGGAGCTCGAATTCTTAC AGTAATTTGTTAACCGG-3' | This study |
| pET28aL-F | 5'- AAATGGGTCGCGGATCCATGGCCCGT AACAACAA-3'          | This study |
| pET28aL-R | 5'- TTGTCGACGGAGCTCGAATTCTTATTT GATCAGCGCTTCC-3'    | This study |
